# Supplementary material for: Solution structure of recombinant Pvfp-5β reveals insights into mussel adhesion
Source: PubMed Central journal article supplement (PMC9314366; doi:10.1038/s42003-022-03699-w), 2022-07-25
Supplement: 42003_2022_3699_MOESM2_ESM.pdf [file 42003_2022_3699_MOESM2_ESM.pdf]

## Description of Additional Supplementary Files

**File name:** Supplementary Movie

**Description:** Coacervation of no-DOPA modified Pvfp-5 $\beta$  in alkaline condition.

**File name:** Supplementary Data

**Description:** The source data behind the graphs in the paper.
