# Supplementary material for: Solution structure of recombinant Pvfp-5β reveals insights into mussel adhesion
Source: PubMed Central journal article supplement (PMC9314366; doi:10.1038/s42003-022-03699-w), 2022-07-25
Supplement: 42003_2022_3699_MOESM4_ESM.pdf [file 42003_2022_3699_MOESM4_ESM.pdf]

## RELAXATION DATA AT 800 MHz AND 298 K

| Residue | R1 [rad/s] |          | R2 [rad/s] |          | NOE       |          | R2/R1    |          | J0       | JwN      | J0,87wH  |
|---------|------------|----------|------------|----------|-----------|----------|----------|----------|----------|----------|----------|
| 2V      | 0.807622   | 0.000937 | 2.084179   | 0.003032 | -0.28858  | 0.000101 | 2.580636 | 0.00675  | 0.39667  | 0.107916 | 0.016233 |
| 3Y      | 1.061219   | 0.001713 | 3.43033    | 0.006251 | -0.273549 | 0.00014  | 3.232443 | 0.011108 | 0.691141 | 0.142172 | 0.021081 |
| 4Y      | 1.246129   | 0.002432 | 4.337517   | 0.009068 | 0.048386  | 0.000149 | 3.480794 | 0.01407  | 0.893472 | 0.176258 | 0.018497 |
| 5P      |            |          |            |          |           |          |          |          |          |          |          |
| 6N      | 1.234004   | 0.003743 | 7.795515   | 0.026011 | 0.493392  | 0.000297 | 6.317253 | 0.04024  | 1.751587 | 0.187291 | 0.009751 |
| 7P      |            |          |            |          |           |          |          |          |          |          |          |
| 8C      | 0.822142   | 0.0059   | 19.09597   | 0.306572 | 0.716389  | 0.000709 | 23.22709 | 0.539572 | 4.579996 | 0.129037 | 0.003637 |
| 9S      | 1.161      | 0.00482  | 13.11359   | 0.098407 | 0.771337  | 0.000465 | 11.29508 | 0.131655 | 3.070452 | 0.183702 | 0.004141 |
| 10P     |            |          |            |          |           |          |          |          |          |          |          |
| 11Y     |            |          |            |          |           |          |          |          |          |          |          |
| 12P     |            |          |            |          |           |          |          |          |          |          |          |
| 13C     |            |          |            |          |           |          |          |          |          |          |          |
| 14R     | 1.162146   | 0.009105 | 11.85369   | 0.153019 | 0.746574  | 0.000805 | 10.19983 | 0.211582 | 2.76091  | 0.183215 | 0.004594 |
| 15N     | 1.19266    | 0.00625  | 11.23684   | 0.088027 | 0.823838  | 0.000608 | 9.421664 | 0.12318  | 2.607023 | 0.190165 | 0.003277 |
| 16G     | 1.190564   | 0.005768 | 12.40292   | 0.100891 | 0.849348  | 0.000549 | 10.41769 | 0.135216 | 2.893783 | 0.190536 | 0.002798 |
| 17G     | 1.265777   | 0.005844 | 11.68324   | 0.087484 | 0.7807    | 0.000471 | 9.230096 | 0.111726 | 2.706552 | 0.200556 | 0.00433  |
| 18T     | 0.953496   | 0.006296 | 17.36199   | 0.23776  | 0.735599  | 0.00069  | 18.20877 | 0.369592 | 4.138242 | 0.150078 | 0.003932 |
| 19C     | 1.187433   | 0.008814 | 10.84908   | 0.130229 | 0.777205  | 0.00079  | 9.136579 | 0.177495 | 2.511743 | 0.188046 | 0.004127 |
| 20K     | 1.075339   | 0.007115 | 12.22858   | 0.13802  | 0.778735  | 0.000681 | 11.37183 | 0.203591 | 2.864277 | 0.170333 | 0.003711 |
| 21K     | 1.106311   | 0.005835 | 10.74298   | 0.074523 | 0.760067  | 0.000602 | 9.710625 | 0.11858  | 2.495705 | 0.174759 | 0.00414  |
| 22R     | 1.26392    | 0.00631  | 9.823425   | 0.057174 | 0.699522  | 0.000526 | 7.77219  | 0.084038 | 2.249034 | 0.19788  | 0.005924 |
| 23G     | 1.06767    | 0.003127 | 6.770319   | 0.020179 | 0.301524  | 0.000233 | 6.341212 | 0.037473 | 1.518709 | 0.15729  | 0.011632 |
| 24L     | 1.238382   | 0.003969 | 9.499103   | 0.031965 | 0.593692  | 0.000339 | 7.670576 | 0.050394 | 2.170767 | 0.190839 | 0.007848 |
| 25G     | 1.277917   | 0.005615 | 11.57581   | 0.060779 | 0.612361  | 0.000432 | 9.058338 | 0.087363 | 2.675466 | 0.197485 | 0.007727 |
| 26S     | 1.063166   | 0.003349 | 10.75416   | 0.046632 | 0.576505  | 0.000341 | 10.11522 | 0.075721 | 2.500918 | 0.163413 | 0.007023 |
| 27Y     | 1.156818   | 0.006652 | 16.9179    | 0.176451 | 0.744421  | 0.000644 | 14.62452 | 0.236626 | 4.003729 | 0.182317 | 0.004612 |
| 28K     | 1.07059    | 0.006818 | 13.38742   | 0.121017 | 0.727788  | 0.000652 | 12.50471 | 0.192675 | 3.148328 | 0.168314 | 0.004546 |
| 29C     | 1.110479   | 0.007149 | 12.4148    | 0.108431 | 0.786543  | 0.000684 | 11.17968 | 0.169618 | 2.905661 | 0.1761   | 0.003697 |
| 30Y     | 0.947769   | 0.007207 | 12.47131   | 0.165005 | 0.773165  | 0.000724 | 13.15859 | 0.274164 | 2.939813 | 0.150003 | 0.003353 |
| 31C     | 1.123204   | 0.005121 | 10.65693   | 0.076404 | 0.782608  | 0.000527 | 9.487968 | 0.111279 | 2.47278  | 0.178016 | 0.003809 |
| 32R     | 1.228973   | 0.005957 | 11.29      | 0.070582 | 0.836283  | 0.000534 | 9.186533 | 0.101959 | 2.615757 | 0.19631  | 0.003138 |
| 33K     | 1.127327   | 0.003938 | 9.243727   | 0.03495  | 0.72505   | 0.000378 | 8.199684 | 0.059647 | 2.124609 | 0.177163 | 0.004835 |
| 34G     | 1.196956   | 0.005257 | 10.28793   | 0.056521 | 0.735312  | 0.000476 | 8.595077 | 0.084969 | 2.372132 | 0.18839  | 0.004942 |
| 35Y     | 1.218401   | 0.005425 | 13.68318   | 0.107618 | 0.834796  | 0.000538 | 11.23044 | 0.138328 | 3.204092 | 0.194579 | 0.00314  |
| 36T     | 1.195836   | 0.004731 | 11.11859   | 0.064111 | 0.813118  | 0.000452 | 9.297757 | 0.090393 | 2.577427 | 0.190374 | 0.003486 |
| 37G     |            |          |            |          |           |          |          |          |          |          |          |
| 38K     | 1.183001   | 0.007471 | 12.39527   | 0.123249 | 0.800769  | 0.000676 | 10.47781 | 0.170356 | 2.89201  | 0.187992 | 0.003676 |
| 39N     | 0.983293   | 0.00638  | 21.63636   | 0.364702 | 0.789414  | 0.000728 | 22.00398 | 0.513662 | 5.183805 | 0.155997 | 0.00323  |
| 40C     | 1.365754   | 0.008141 | 13.62593   | 0.157385 | 0.801141  | 0.000659 | 9.976854 | 0.174704 | 3.170929 | 0.217045 | 0.004236 |
| 41Q     | 1.237213   | 0.009108 | 13.46346   | 0.192695 | 0.806545  | 0.000704 | 10.88208 | 0.23586  | 3.147319 | 0.196772 | 0.003733 |
| 42Y     | 1.157386   | 0.005264 | 16.60318   | 0.1871   | 0.812798  | 0.000534 | 14.34542 | 0.226907 | 3.927635 | 0.184244 | 0.00338  |
| 43N     | 1.098535   | 0.004705 | 11.55773   | 0.076846 | 0.771362  | 0.000475 | 10.52104 | 0.115011 | 2.696669 | 0.173819 | 0.003918 |
| 44A     |            |          |            |          |           |          |          |          |          |          |          |
| 45C     | 0.816845   | 0.004292 | 14.91538   | 0.166959 | 0.769434  | 0.000517 | 18.25975 | 0.300345 | 3.555016 | 0.129211 | 0.002938 |
| 46F     | 1.069538   | 0.003174 | 13.73356   | 0.077407 | 0.830314  | 0.000355 | 12.84064 | 0.110482 | 3.235007 | 0.170695 | 0.002831 |
| 47P     |            |          |            |          |           |          |          |          |          |          |          |
| 48N     | 1.118441   | 0.00401  | 11.39733   | 0.067496 | 0.838413  | 0.000455 | 10.19037 | 0.096886 | 2.655951 | 0.17871  | 0.002819 |
| 49P     |            |          |            |          |           |          |          |          |          |          |          |
| 50C     | 1.072913   | 0.003022 | 13.98435   | 0.088483 | 0.814392  | 0.000361 | 13.03401 | 0.119186 | 3.295848 | 0.170837 | 0.003106 |
| 51L     | 1.197903   | 0.005902 | 10.99816   | 0.096129 | 0.756414  | 0.000483 | 9.181175 | 0.125482 | 2.54664  | 0.189126 | 0.004551 |
| 52N     | 1.129302   | 0.004166 | 10.7191    | 0.059209 | 0.788018  | 0.000396 | 9.4918   | 0.087449 | 2.487355 | 0.179124 | 0.003734 |
| 53G     | 1.037074   | 0.003254 | 12.40024   | 0.085024 | 0.798764  | 0.000347 | 11.95695 | 0.119499 | 2.911548 | 0.164754 | 0.003255 |
| 54G     | 1.289827   | 0.00402  | 11.49026   | 0.074155 | 0.789817  | 0.00033  | 8.908371 | 0.085257 | 2.656361 | 0.204639 | 0.004229 |
| 55T     | 1.023052   | 0.00381  | 14.13825   | 0.097715 | 0.81852   | 0.000441 | 13.81967 | 0.146985 | 3.339916 | 0.162996 | 0.002896 |
| 56C     | 1.198377   | 0.00531  | 11.13234   | 0.092071 | 0.810069  | 0.000494 | 9.28952  | 0.117993 | 2.58046  | 0.190694 | 0.00355  |
| 57G     | 1.201012   | 0.004251 | 12.34298   | 0.082712 | 0.776275  | 0.000403 | 10.27715 | 0.105244 | 2.876462 | 0.190171 | 0.004191 |
| 58Y     |            |          |            |          |           |          |          |          |          |          |          |
| 59V     | 1.188766   | 0.004444 | 13.74273   | 0.080296 | 0.763582  | 0.000409 | 11.5605  | 0.110762 | 3.221147 | 0.187881 | 0.004384 |
| 60Y     |            |          |            |          |           |          |          |          |          |          |          |
| 61G     | 1.468312   | 0.003037 | 7.214774   | 0.016302 | 0.635091  | 0.000226 | 4.913653 | 0.021267 | 1.581724 | 0.227683 | 0.008357 |
| 62Y     | 1.101145   | 0.002965 | 10.85928   | 0.048857 | 0.756684  | 0.000303 | 9.861814 | 0.070925 | 2.524782 | 0.173857 | 0.004179 |

|     |          |          |          |          |          |          |          |          |          |          |          |
|-----|----------|----------|----------|----------|----------|----------|----------|----------|----------|----------|----------|
| 63P |          |          |          |          |          |          |          |          |          |          |          |
| 64Y | 1.301713 | 0.004955 | 13.12959 | 0.08201  | 0.754935 | 0.000429 | 10.0864  | 0.101396 | 3.05632  | 0.205471 | 0.004976 |
| 65Y | 1.290748 | 0.003727 | 12.98375 | 0.068443 | 0.782355 | 0.000332 | 10.05909 | 0.082072 | 3.022458 | 0.204562 | 0.004382 |
| 66K | 1.18271  | 0.004929 | 12.32542 | 0.080777 | 0.7775   | 0.000482 | 10.42133 | 0.111727 | 2.874485 | 0.187306 | 0.004105 |
| 67C | 1.187969 | 0.004504 | 11.01625 | 0.061359 | 0.793254 | 0.000449 | 9.273187 | 0.086811 | 2.552958 | 0.188574 | 0.003831 |
| 68S | 1.020088 | 0.004277 | 12.11657 | 0.078037 | 0.762992 | 0.000414 | 11.87797 | 0.126304 | 2.843518 | 0.161208 | 0.003771 |
| 69C | 1.140921 | 0.00357  | 10.13343 | 0.052235 | 0.788755 | 0.000347 | 8.881802 | 0.073572 | 2.342253 | 0.180986 | 0.003759 |
| 70P |          |          |          |          |          |          |          |          |          |          |          |
| 71Y | 1.094394 | 0.002682 | 10.67231 | 0.040467 | 0.725666 | 0.000278 | 9.751803 | 0.060877 | 2.479267 | 0.172003 | 0.004683 |
| 72G | 1.137263 | 0.00356  | 14.84389 | 0.089112 | 0.692647 | 0.000338 | 13.05229 | 0.119215 | 3.496559 | 0.177869 | 0.005452 |
| 73Y | 1.253178 | 0.003403 | 12.18525 | 0.059606 | 0.793216 | 0.000347 | 9.72348  | 0.073971 | 2.831517 | 0.198924 | 0.004042 |
| 74Y | 1.186968 | 0.003729 | 11.56676 | 0.061797 | 0.765031 | 0.000351 | 9.744797 | 0.082677 | 2.687625 | 0.187637 | 0.00435  |
| 75G |          |          |          |          |          |          |          |          |          |          |          |
| 76K | 1.21811  | 0.004518 | 11.75642 | 0.059599 | 0.753893 | 0.000411 | 9.651365 | 0.084724 | 2.73002  | 0.192245 | 0.004676 |
| 77Q | 1.066196 | 0.003899 | 15.25498 | 0.114939 | 0.777708 | 0.000425 | 14.30786 | 0.160124 | 3.607797 | 0.168859 | 0.003697 |
| 78C | 1.293463 | 0.00543  | 12.32359 | 0.088914 | 0.778828 | 0.000442 | 9.527599 | 0.108739 | 2.86011  | 0.204886 | 0.004462 |
| 79Q | 1.139149 | 0.004173 | 14.0191  | 0.099906 | 0.791073 | 0.00044  | 12.30665 | 0.132786 | 3.29567  | 0.180767 | 0.003712 |
| 80L | 1.206154 | 0.004531 | 14.55431 | 0.11878  | 0.789153 | 0.000417 | 12.06672 | 0.14381  | 3.418203 | 0.191345 | 0.003967 |
| 81K | 1.108028 | 0.003205 | 10.62179 | 0.036841 | 0.735384 | 0.00031  | 9.586214 | 0.060981 | 2.465294 | 0.174396 | 0.004573 |
| 82K | 1.16346  | 0.003291 | 9.766153 | 0.03611  | 0.613121 | 0.000281 | 8.394063 | 0.054782 | 2.246257 | 0.179818 | 0.007021 |
| 83Y | 1.106616 | 0.001917 | 7.112101 | 0.012581 | 0.390051 | 0.000155 | 6.42689  | 0.022502 | 1.598824 | 0.165302 | 0.010528 |

RELAXATION DATA AT 600 MHz AND 298 K

| Residue | R1 [rad/s] |          | R2 [rad/s] |          | NOE       |          | R2/R1    |          | J(0)     | JwN      | J(0.87)Wh |
|---------|------------|----------|------------|----------|-----------|----------|----------|----------|----------|----------|-----------|
| 2V      | 0.877068   | 0.000606 | 2.180355   | 0.00259  | -0.627797 | 0.002871 | 2.485959 | 0.004672 | 0.482386 | 0.131048 | 0.022269  |
| 3Y      | 1.180736   | 0.001109 | 3.13561    | 0.00343  | -0.467674 | 0.003293 | 2.655641 | 0.005399 | 0.711152 | 0.181637 | 0.02703   |
| 4Y      | 1.400682   | 0.001583 | 7.220551   | 0.00784  | -0.174166 | 0.002649 | 5.155024 | 0.011424 | 1.871338 | 0.226812 | 0.025653  |
| 5P      |            |          |            |          |           |          |          |          |          |          |           |
| 6N      | 1.543107   | 0.003068 | 7.212827   | 0.022695 | 0.398559  | 0.005904 | 4.674223 | 0.024    | 1.86104  | 0.274254 | 0.014476  |
| 7P      |            |          |            |          |           |          |          |          |          |          |           |
| 8C      | 1.175232   | 0.004739 | 15.53228   | 0.124406 | 0.676366  | 0.014441 | 13.21635 | 0.159146 | 4.349308 | 0.217878 | 0.005933  |
| 9S      | 1.58966    | 0.004371 | 11.95352   | 0.074433 | 0.730883  | 0.009655 | 7.519546 | 0.067501 | 3.244991 | 0.2971   | 0.006673  |
| 10P     |            |          |            |          |           |          |          |          |          |          |           |
| 11Y     |            |          |            |          |           |          |          |          |          |          |           |
| 12P     |            |          |            |          |           |          |          |          |          |          |           |
| 13C     |            |          |            |          |           |          |          |          |          |          |           |
| 14R     | 1.574133   | 0.007831 | 10.22646   | 0.12421  | 0.703221  | 0.015668 | 6.496565 | 0.111226 | 2.743109 | 0.292997 | 0.007287  |
| 15N     | 1.666176   | 0.005901 | 10.70034   | 0.052351 | 0.769872  | 0.013091 | 6.422099 | 0.054163 | 2.869298 | 0.313193 | 0.005981  |
| 16G     | 1.59897    | 0.004501 | 12.2774    | 0.054883 | 0.795235  | 0.011074 | 7.678321 | 0.055936 | 3.339814 | 0.301679 | 0.005107  |
| 17G     | 1.733357   | 0.005161 | 11.03823   | 0.048772 | 0.771161  | 0.010773 | 6.368121 | 0.047098 | 2.957762 | 0.325883 | 0.006187  |
| 18T     | 1.370212   | 0.00599  | 14.58765   | 0.103582 | 0.707364  | 0.015388 | 10.64627 | 0.122133 | 4.045267 | 0.255198 | 0.006254  |
| 19C     | 1.601998   | 0.007425 | 9.891893   | 0.064747 | 0.738021  | 0.015152 | 6.17472  | 0.069035 | 2.64236  | 0.299722 | 0.006546  |
| 20K     | 1.471779   | 0.005857 | 15.82957   | 0.114452 | 0.725276  | 0.014615 | 10.7554  | 0.120565 | 4.392315 | 0.274841 | 0.006307  |
| 21K     | 1.520767   | 0.00483  | 9.666114   | 0.034008 | 0.689548  | 0.011092 | 6.356079 | 0.042548 | 2.587457 | 0.282491 | 0.007364  |
| 22R     | 1.720417   | 0.00535  | 9.475154   | 0.038181 | 0.658434  | 0.010855 | 5.507475 | 0.03932  | 2.500646 | 0.3181   | 0.009166  |
| 23G     | 1.28117    | 0.002322 | 5.919498   | 0.011933 | 0.227793  | 0.004399 | 4.620385 | 0.017687 | 1.521147 | 0.221665 | 0.015432  |
| 24L     | 1.543374   | 0.003539 | 8.422251   | 0.022125 | 0.584223  | 0.008148 | 5.457037 | 0.026847 | 2.21853  | 0.282206 | 0.010009  |
| 25G     | 1.659858   | 0.004476 | 10.23414   | 0.055383 | 0.532327  | 0.00829  | 6.165672 | 0.049994 | 2.727364 | 0.301129 | 0.012108  |
| 26S     | 1.400665   | 0.003492 | 9.328347   | 0.027165 | 0.531664  | 0.007824 | 6.659941 | 0.035998 | 2.50325  | 0.254081 | 0.010232  |
| 27Y     | 1.547505   | 0.005262 | 14.01674   | 0.072733 | 0.713037  | 0.012326 | 9.057637 | 0.077797 | 3.852175 | 0.28846  | 0.006927  |
| 28K     | 1.479564   | 0.005934 | 11.15612   | 0.091197 | 0.723389  | 0.013644 | 7.540141 | 0.091878 | 3.028903 | 0.276218 | 0.006384  |
| 29C     | 1.5413     | 0.006103 | 10.27614   | 0.056289 | 0.729662  | 0.014351 | 6.667194 | 0.062922 | 2.763265 | 0.28801  | 0.006499  |
| 30Y     | 1.354478   | 0.006197 | 12.35208   | 0.092478 | 0.768731  | 0.016635 | 9.119442 | 0.109999 | 3.397529 | 0.25456  | 0.004886  |
| 31C     | 1.564619   | 0.004563 | 9.537262   | 0.047971 | 0.708246  | 0.010593 | 6.09558  | 0.048437 | 2.543787 | 0.291443 | 0.00712   |
| 32R     | 1.694291   | 0.005925 | 10.05888   | 0.043574 | 0.772554  | 0.012016 | 5.936923 | 0.046481 | 2.678192 | 0.318603 | 0.006011  |
| 33K     | 1.544119   | 0.003568 | 6.95849    | 0.021634 | 0.632856  | 0.007854 | 4.506448 | 0.024425 | 1.793163 | 0.284413 | 0.008843  |
| 34G     | 1.638977   | 0.0051   | 9.663353   | 0.038067 | 0.646638  | 0.010539 | 5.895968 | 0.041571 | 2.567525 | 0.302509 | 0.009034  |
| 35Y     | 1.612543   | 0.005016 | 11.97037   | 0.063063 | 0.755829  | 0.012395 | 7.423289 | 0.062198 | 3.247116 | 0.302487 | 0.006142  |
| 36T     | 1.661698   | 0.004203 | 9.674923   | 0.046236 | 0.737433  | 0.010125 | 5.822312 | 0.042553 | 2.570107 | 0.310864 | 0.006806  |
| 37G     |            |          |            |          |           |          |          |          |          |          |           |
| 38K     | 1.602708   | 0.00637  | 10.85199   | 0.056426 | 0.772375  | 0.013889 | 6.771036 | 0.062117 | 2.92308  | 0.301373 | 0.00569   |
| 39N     | 1.408254   | 0.006353 | 17.45471   | 0.17643  | 0.744462  | 0.016066 | 12.39457 | 0.181195 | 4.876052 | 0.263724 | 0.005613  |
| 40C     | 1.866607   | 0.007435 | 12.46608   | 0.086136 | 0.782787  | 0.015088 | 6.67847  | 0.072747 | 3.354456 | 0.351533 | 0.006324  |

|     |          |          |          |          |          |          |          |          |          |          |          |
|-----|----------|----------|----------|----------|----------|----------|----------|----------|----------|----------|----------|
| 41Q | 1.670411 | 0.006237 | 12.02933 | 0.10127  | 0.758559 | 0.013124 | 7.201419 | 0.087516 | 3.255727 | 0.313468 | 0.006291 |
| 42Y | 1.58604  | 0.004598 | 13.05421 | 0.093994 | 0.777928 | 0.010628 | 8.230695 | 0.083122 | 3.56761  | 0.298482 | 0.005494 |
| 43N | 1.538788 | 0.004111 | 9.820162 | 0.039439 | 0.763909 | 0.010584 | 6.38175  | 0.042681 | 2.631664 | 0.288995 | 0.005667 |
| 44A |          |          |          |          |          |          |          |          |          |          |          |
| 45C | 1.209377 | 0.003798 | 14.48131 | 0.125644 | 0.734044 | 0.010938 | 11.97419 | 0.141494 | 4.039785 | 0.226133 | 0.005017 |
| 46F | 1.457805 | 0.003008 | 10.89933 | 0.060036 | 0.739201 | 0.0073   | 7.476531 | 0.056609 | 2.958065 | 0.272792 | 0.00593  |
| 47P |          |          |          |          |          |          |          |          |          |          |          |
| 48N | 1.540844 | 0.003771 | 9.576119 | 0.037026 | 0.73311  | 0.008537 | 6.214853 | 0.039239 | 2.55938  | 0.288072 | 0.006414 |
| 49P |          |          |          |          |          |          |          |          |          |          |          |
| 50C | 1.466385 | 0.002692 | 12.20707 | 0.0442   | 0.741783 | 0.007834 | 8.324604 | 0.045427 | 3.337677 | 0.274502 | 0.005906 |
| 51L | 1.632872 | 0.004817 | 12.73833 | 0.090072 | 0.756909 | 0.010852 | 7.801186 | 0.078176 | 3.467941 | 0.306349 | 0.006191 |
| 52N | 1.554113 | 0.004003 | 9.677402 | 0.038586 | 0.743775 | 0.008853 | 6.226961 | 0.040867 | 2.587199 | 0.29101  | 0.006211 |
| 53G | 1.407819 | 0.002599 | 11.12089 | 0.044185 | 0.762187 | 0.007541 | 7.899375 | 0.045967 | 3.0304   | 0.264331 | 0.005222 |
| 54G | 1.745438 | 0.002843 | 12.57331 | 0.057121 | 0.738927 | 0.006608 | 7.203528 | 0.044458 | 3.402394 | 0.326602 | 0.007108 |
| 55T | 1.430483 | 0.003582 | 12.6831  | 0.054437 | 0.769135 | 0.009211 | 8.866307 | 0.060256 | 3.482598 | 0.26886  | 0.005151 |
| 56C | 1.62728  | 0.004397 | 10.16066 | 0.055073 | 0.788899 | 0.011041 | 6.24395  | 0.050715 | 2.718461 | 0.306736 | 0.005358 |
| 57G | 1.676146 | 0.004183 | 11.09688 | 0.04728  | 0.73921  | 0.00924  | 6.620472 | 0.044728 | 2.982473 | 0.313649 | 0.006818 |
| 58Y |          |          |          |          |          |          |          |          |          |          |          |
| 59V | 1.643981 | 0.004652 | 12.3123  | 0.048082 | 0.735838 | 0.009264 | 7.489322 | 0.050441 | 3.341535 | 0.307477 | 0.006774 |
| 60Y |          |          |          |          |          |          |          |          |          |          |          |
| 61G | 1.697314 | 0.002229 | 6.844619 | 0.009962 | 0.532303 | 0.004423 | 4.032619 | 0.011165 | 1.733618 | 0.307923 | 0.012382 |
| 62Y | 1.496123 | 0.002423 | 9.620025 | 0.021378 | 0.725611 | 0.006742 | 6.429968 | 0.024704 | 2.578708 | 0.279401 | 0.006403 |
| 63P |          |          |          |          |          |          |          |          |          |          |          |
| 64Y | 1.796928 | 0.004697 | 11.46544 | 0.053827 | 0.70933  | 0.008592 | 6.380576 | 0.046634 | 3.070839 | 0.33477  | 0.008147 |
| 65Y | 1.761341 | 0.003538 | 11.39739 | 0.038488 | 0.740457 | 0.007343 | 6.470862 | 0.03485  | 3.057298 | 0.329652 | 0.007131 |
| 66K | 1.623782 | 0.00469  | 11.2625  | 0.057136 | 0.735366 | 0.011303 | 6.935973 | 0.055222 | 3.038554 | 0.303678 | 0.006703 |
| 67C | 1.586548 | 0.004017 | 9.532526 | 0.030782 | 0.72234  | 0.009097 | 6.008345 | 0.034616 | 2.539494 | 0.296145 | 0.006871 |
| 68S | 1.44655  | 0.004094 | 10.3564  | 0.046654 | 0.733058 | 0.009835 | 7.15938  | 0.052516 | 2.801019 | 0.270441 | 0.006023 |
| 69C | 1.530826 | 0.00276  | 9.977397 | 0.028098 | 0.738682 | 0.007622 | 6.517658 | 0.030105 | 2.677957 | 0.286434 | 0.00624  |
| 70P |          |          |          |          |          |          |          |          |          |          |          |
| 71Y | 1.519215 | 0.002542 | 9.533669 | 0.022377 | 0.666611 | 0.005872 | 6.275393 | 0.02523  | 2.548466 | 0.281241 | 0.0079   |
| 72G | 1.546129 | 0.003242 | 12.20177 | 0.04143  | 0.651157 | 0.007488 | 7.891815 | 0.043343 | 3.321662 | 0.285564 | 0.008413 |
| 73Y | 1.650982 | 0.003005 | 11.31583 | 0.051516 | 0.701999 | 0.006747 | 6.853997 | 0.043677 | 3.048999 | 0.307246 | 0.007674 |
| 74Y | 1.645829 | 0.003454 | 10.94169 | 0.04925  | 0.742523 | 0.007759 | 6.648128 | 0.043876 | 2.942008 | 0.308127 | 0.00661  |
| 75G |          |          |          |          |          |          |          |          |          |          |          |
| 76K | 1.632395 | 0.004183 | 10.26314 | 0.032752 | 0.697448 | 0.009019 | 6.287168 | 0.036175 | 2.744835 | 0.303582 | 0.007704 |
| 77Q | 1.495163 | 0.003768 | 13.60793 | 0.076474 | 0.734678 | 0.009388 | 9.101305 | 0.074083 | 3.741565 | 0.279596 | 0.006188 |
| 78C | 1.747137 | 0.004304 | 11.1349  | 0.070788 | 0.744836 | 0.009486 | 6.373227 | 0.056216 | 2.98308  | 0.327205 | 0.006954 |
| 79Q | 1.587401 | 0.003974 | 12.49558 | 0.057    | 0.74645  | 0.009161 | 7.871721 | 0.055615 | 3.403719 | 0.29736  | 0.006278 |
| 80L | 1.638796 | 0.003927 | 11.73128 | 0.068323 | 0.75944  | 0.00893  | 7.158471 | 0.058845 | 3.173598 | 0.307575 | 0.006149 |
| 81K | 1.519026 | 0.002743 | 10.07371 | 0.036071 | 0.676296 | 0.006588 | 6.631693 | 0.03572  | 2.706235 | 0.281612 | 0.00767  |
| 82K | 1.551273 | 0.002695 | 11.55303 | 0.031296 | 0.570378 | 0.005721 | 7.447446 | 0.033113 | 3.129561 | 0.283058 | 0.010395 |
| 83Y | 1.377093 | 0.001426 | 8.76235  | 0.015199 | 0.27     | 0.002542 | 6.362931 | 0.017627 | 2.335512 | 0.239865 | 0.01568  |
